# Supplementary material
Source: MDPI journal article supplement (https://www.mdpi.com/2073-4344/11/2/216)
Supplement: s1 [file s1]

## Biocatalytic transformation of 5-hydroxymethylfurfural into 2,5-di(hydroxymethyl)furan by a newly isolated *Fusarium striatum* strain

Alberto Millán <sup>1</sup>, Núria Sala <sup>2</sup>, Mercè Torres <sup>2</sup> and Ramon Canela <sup>1,\*</sup>

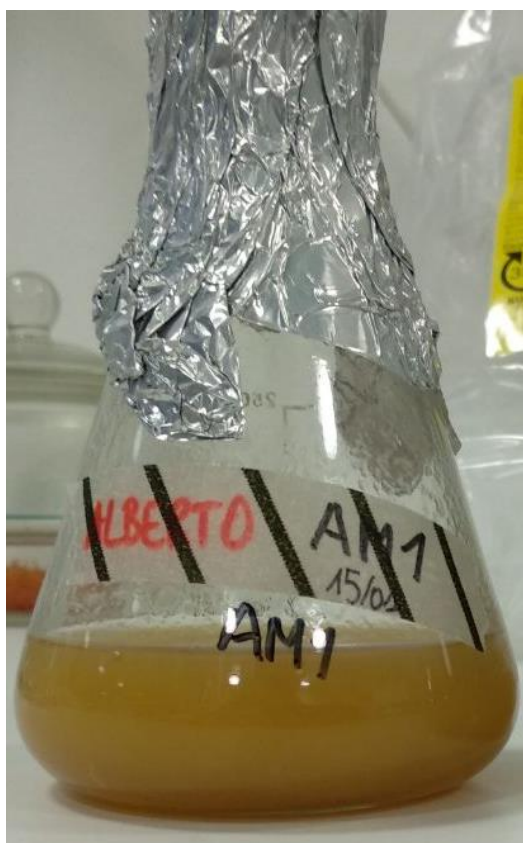

**Figure S1.** *F. striatum* growth in malt extract broth.

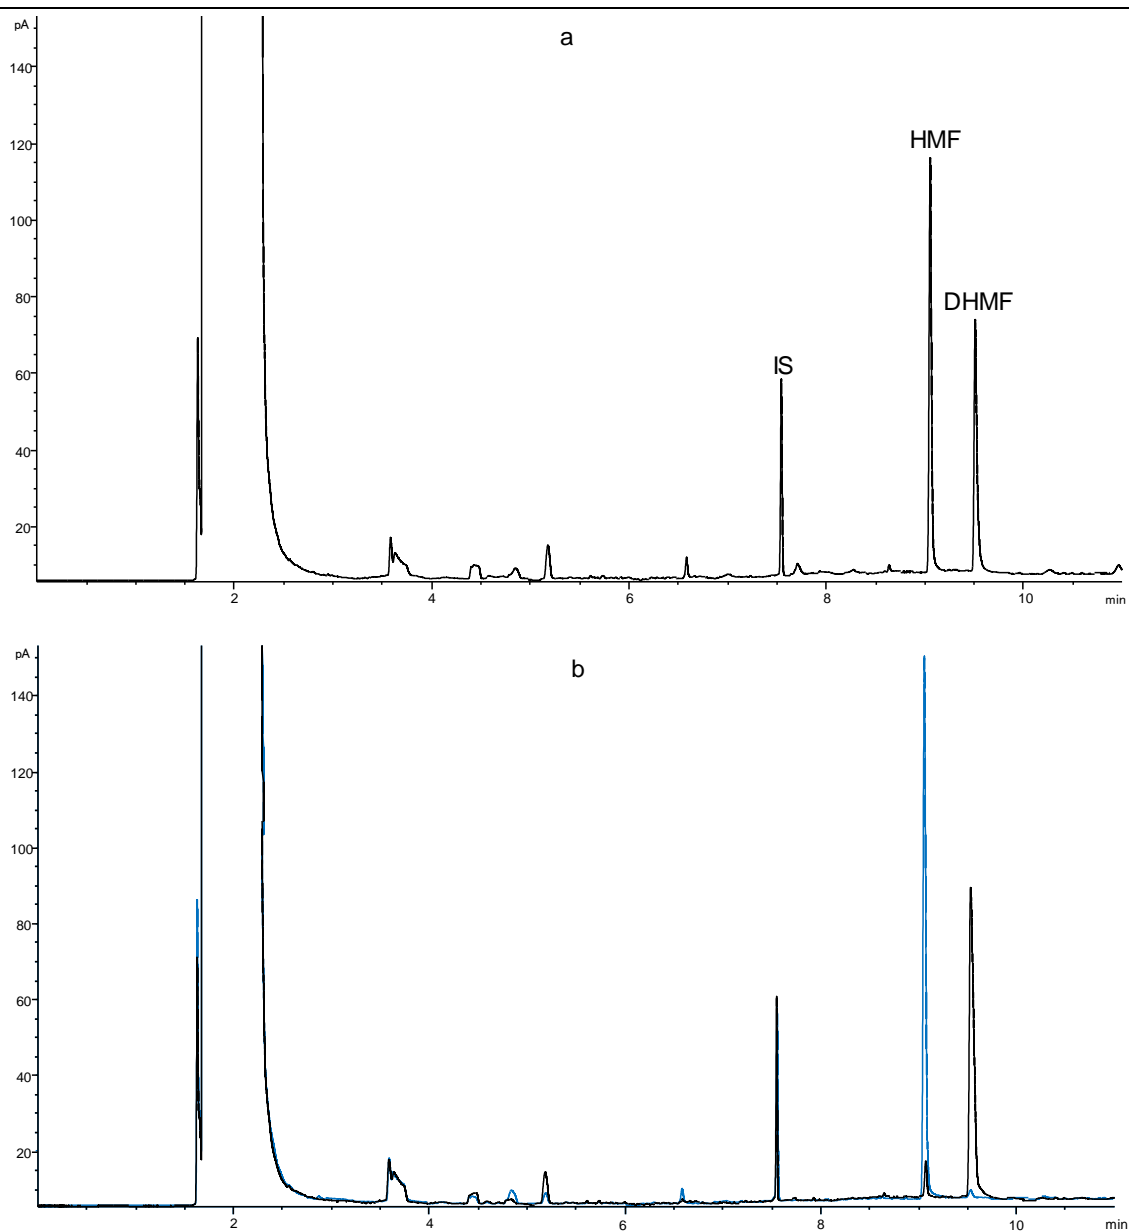

**Figure S2.** Chromatograms from the GC-FID measurements: a) Commercial standards; b) Biotransformation results. In blue, sample at  $t=0$  h after HMF addition. In black, sample from a completed biotransformation.

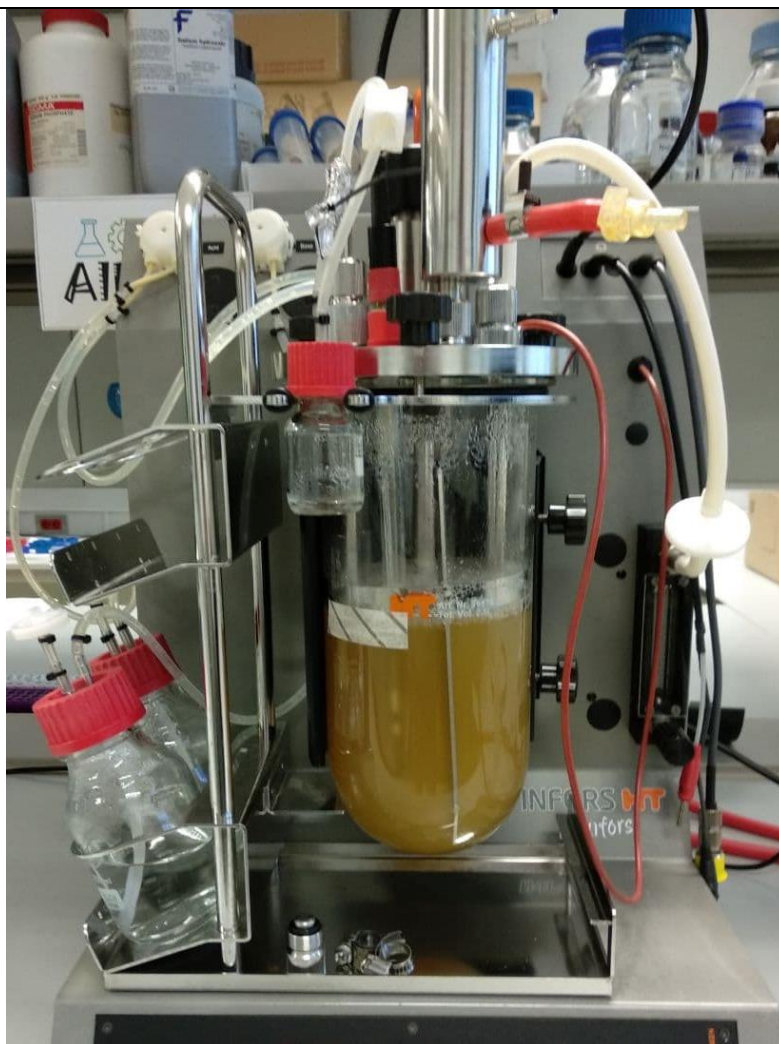

**Figure S3.** *F. striatum* growth in the bioreactor

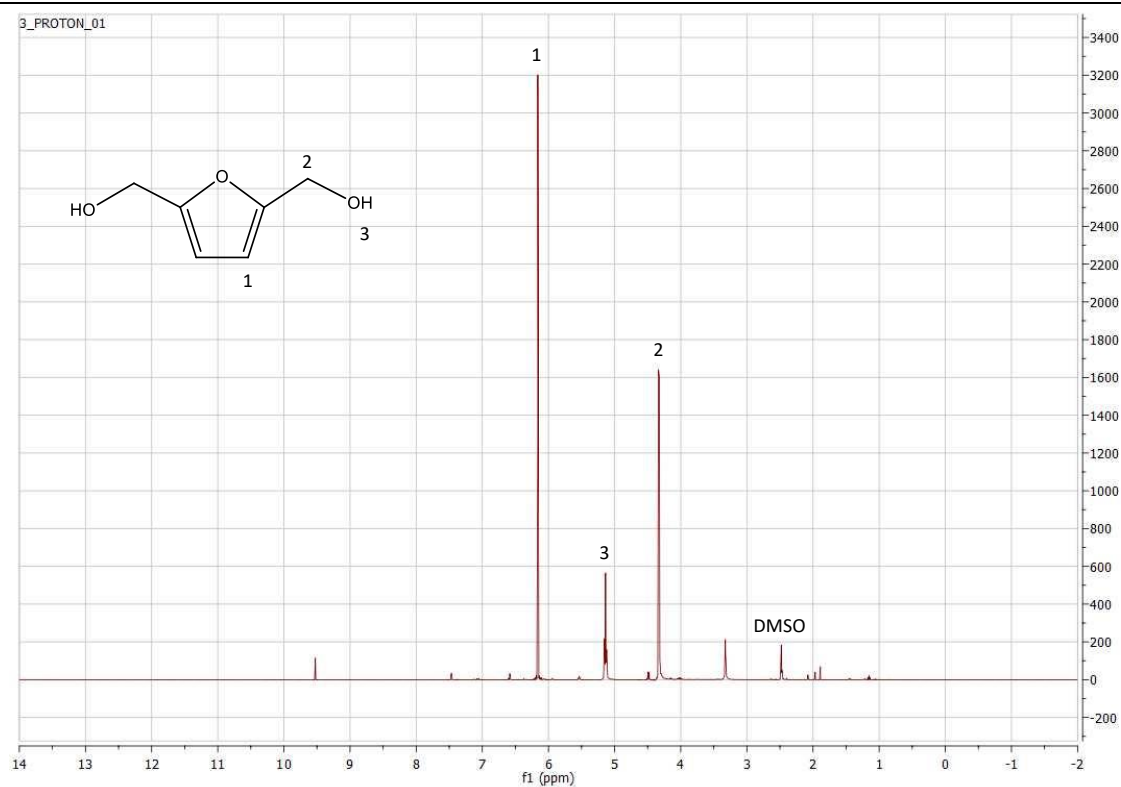

**Figure S4.**  $^1\text{H}$  NMR in  $\text{DMSO-d}_6$  of the DHMF recovered as a yellow solid
